# Supplementary material for: Characteristics of Commercial and Raw Pellets Available on the Italian Market: Study of Organic and Inorganic Fraction and Related Chemometric Approach
Source: MDPI journal article supplement (doi:10.3390/ijerph20166559), 2023-08-11
Supplement: s1 [file s1]

**Table S1.** Synoptic table of all the measurements carried out on the samples investigated in this study. LOD: Limit of Detection.

| Analysis                     | Method                           | LOD     |   | olive pomace (bulk) #1 | olive pomace (bulk) #2 | wood sawdust #3 | wood sawdust #4 | wood chips (pruning and wood waste) #5 | logs (wood briquettes) #A | briquettes (wood briquettes) #B | briquettes (wood briquettes) #C | briquettes (wood briquettes) #D | Canadian pellets #E | Romanian pellets #F | pellets #G  | pomace peanuts #H | briquettes (pomace briquettes) #I | Romanian pellet #L | Romanian pellet #M | pellet #N | pellet #O   |
|------------------------------|----------------------------------|---------|---|------------------------|------------------------|-----------------|-----------------|----------------------------------------|---------------------------|---------------------------------|---------------------------------|---------------------------------|---------------------|---------------------|-------------|-------------------|-----------------------------------|--------------------|--------------------|-----------|-------------|
| Physical state               | visual                           | -       | - | solid                  | solid                  | solid           | solid           | solid                                  | solid                     | solid                           | solid                           | solid                           | solid               | solid               | solid       | solid             | solid                             | solid              | solid              | solid     | solid       |
| Color                        | visual                           | -       | - | dark brown             | dark brown             | light brown     | light brown     | dark brown                             | light brown               | light brown                     | light brown                     | brown                           | brown               | brown               | light brown | light brown       | dark brown                        | light brown        | brown              | brown     | light brown |
| Odor                         | olfactory                        | -       | - | pomace                 | pomace                 | wood            | wood            | vegetable                              | wood                      | wood                            | wood                            | wood                            | pellet              | pellet              | pellet      | pomace            | pomace                            | pellet             | pellet             | pellet    | pellet      |
| pH                           | CNR IRSA 1<br>Q64 Vol. 3<br>1985 | pH unit | - | 3.7                    | 4.1                    | 4.2             | 5.2             | 7.8                                    | 4.8                       | 5.5                             | 5                               | 4.7                             | 4                   | 5                   | 4.4         | 3.9               | 4.6                               | 4.1                | 5.2                | 4.1       | 5.6         |
| Dry matter at 105 °C         | CNR IRSA 2<br>Q64 Vol. 2<br>1984 | % w/w   | - | 82.5                   | 82.4                   | 90.5            | 87.5            | 53.7                                   | 90.7                      | 90.7                            | 89.3                            | 90                              | 93.3                | 95.7                | 92.7        | 82.8              | 88.9                              | 91.8               | 94                 | 94.2      | 95.7        |
| Humidity                     | CNR IRSA 2<br>Q64 Vol. 2<br>1984 | % w/w   | - | 17.5                   | 17.6                   | 9.5             | 12.5            | 46.3                                   | 9.3                       | 9.3                             | 10.7                            | 10                              | 6.7                 | 4.3                 | 7.3         | 17.2              | 11.1                              | 8.2                | 6                  | 5.8       | 4.3         |
| Dry matter at 600 °C         | CNR IRSA 2<br>Q64 Vol. 2<br>1985 | % w/w   | - | 0.79                   | 0.87                   | 0.33            | 1.1             | 4                                      | 1.1                       | 2                               | 1.2                             | 2.4                             | 0.36                | 0.97                | 0.32        | 0.81              | 3                                 | 0.39               | 0.92               | 0.38      | 0.95        |
| Total Organic Compound (TOC) | UNI EN 13137:2002                | % w/w   | - | 45.8                   | 42.3                   | 46.2            | 43.5            | 17.8                                   | 40.9                      | 41.6                            | 44.5                            | 45.3                            | 47.7                | 47.2                | 46.1        | 41.4              | 46.6                              | 47.1               | 46.2               | 47.3      | 47.3        |

|                |                                    |       |     |      |      |      |      |      |      |      |      |      |      |      |      |      |      |      |      |      |      |
|----------------|------------------------------------|-------|-----|------|------|------|------|------|------|------|------|------|------|------|------|------|------|------|------|------|------|
|                | CNR IRSA 12                        |       |     |      |      |      |      |      |      |      |      |      |      |      |      |      |      |      |      |      |      |
| Sulfur         | Q64 Vol. 3 1986                    | mg/kg | 10  | <10  | <10  | <10  | <10  | <10  | <10  | <10  | <10  | <10  | <10  | <10  | <10  | <10  | <10  | <10  | <10  | <10  | <10  |
|                | EPA 9013A 2004 + EPA               |       |     |      |      |      |      |      |      |      |      |      |      |      |      |      |      |      |      |      |      |
| Total cyanides | 9010C 2004 + EPA 9014 1996         | mg/kg | 0.1 | <0.1 | <0.1 | <0.1 | <0.1 | <0.1 | <0.1 | <0.1 | <0.1 | <0.1 | <0.1 | <0.1 | <0.1 | <0.1 | <0.1 | <0.1 | <0.1 | <0.1 | <0.1 |
|                |                                    |       |     |      |      |      |      |      |      |      |      |      |      |      |      |      |      |      |      |      |      |
| Metals         |                                    |       |     |      |      |      |      |      |      |      |      |      |      |      |      |      |      |      |      |      |      |
| - Aluminum     | UNI EN 13657:2004 + EPA 6010C 2007 | mg/kg |     | 21.2 | 19.8 | 2.5  | 35.5 | 2540 | 15.2 | 78.4 | 66.6 | 45.7 | 24.9 | 34.5 | 7.7  | 17.8 | 45   | 10.7 | 31.3 | 19.9 | 53.3 |
| - Antimony     | UNI EN 13657:2004 + EPA 6010C 2007 | mg/kg | 0.5 | <0.5 | <0.5 | <0.5 | <0.5 | 0.78 | <0.5 | <0.5 | <0.5 | <0.5 | <0.5 | <0.5 | <0.5 | <0.5 | <0.5 | <0.5 | <0.5 | <0.5 | <0.5 |
| - Silver       | UNI EN 13657:2004 + EPA 6010C 2007 | mg/kg | 0.5 | <0.5 | <0.5 | <0.5 | <0.5 | <0.5 | <0.5 | <0.5 | <0.5 | <0.5 | <0.5 | <0.5 | <0.5 | <0.5 | <0.5 | <0.5 | <0.5 | <0.5 | <0.5 |
| - Arsenic      | UNI EN 13657:2004 + EPA 6010C 2007 | mg/kg | 0.5 | <0.5 | <0.5 | <0.5 | <0.5 | 2.3  | <0.5 | <0.5 | <0.5 | <0.5 | <0.5 | <0.5 | <0.5 | <0.5 | <0.5 | <0.5 | <0.5 | <0.5 | <0.5 |
| - Barium       | UNI EN 13657:2004 + EPA 6010C 2007 | mg/kg |     | 1    | 1.2  | 3.8  | 15.6 | 55.6 | 3.7  | 22.4 | 34.4 | 7.1  | 5.8  | 29.7 | 10.1 | 0.86 | 5.4  | 12.4 | 30.1 | 5    | 31.1 |
| - Beryllium    | UNI EN 13657:2004 + EPA 6010C 2007 | mg/kg | 0.5 | <0.5 | <0.5 | <0.5 | <0.5 | <0.5 | <0.5 | <0.5 | <0.5 | <0.5 | <0.5 | <0.5 | <0.5 | <0.5 | <0.5 | <0.5 | <0.5 | <0.5 | <0.5 |
| - Boron        | UNI EN 13657:2004 + EPA 6010C 2007 | mg/kg |     | 5.7  | 5.8  | 6.1  | 5.9  | 64.7 | 4.6  | 4    | 9.7  | 8.3  | 1.6  | 3.1  | 7.5  | 5.2  | 8.4  | 1.7  | 2.3  | 1.7  | 3.6  |

[illegible]

[illegible]

[illegible]

[illegible]

[illegible]

[illegible]



[illegible]

[illegible]

[illegible]

[illegible]

[illegible]

[illegible]

|                                     |                                       |       |       |      |       |      |      |       |      |      |      |      |      |      |      |       |      |      |      |      |      |
|-------------------------------------|---------------------------------------|-------|-------|------|-------|------|------|-------|------|------|------|------|------|------|------|-------|------|------|------|------|------|
| - Chlorpyrifos<br>(Dursban)         | EPA 3550C<br>2007 + EPA<br>8270D 2007 | mg/kg | 0.1   | <0.1 | <0.1  | <0.1 | <0.1 | <0.1  | <0.1 | <0.1 | <0.1 | <0.1 | <0.1 | <0.1 | <0.1 | <0.1  | <0.1 | <0.1 | <0.1 | <0.1 | <0.1 |
| - Trichloronate                     | EPA 3550C<br>2007 + EPA<br>8270D 2007 | mg/kg | 0.1   | <0.1 | <0.1  | <0.1 | <0.1 | <0.1  | <0.1 | <0.1 | <0.1 | <0.1 | <0.1 | <0.1 | <0.1 | <0.1  | <0.1 | <0.1 | <0.1 | <0.1 | <0.1 |
| - Merphos                           | EPA 3550C<br>2007 + EPA<br>8270D 2007 | mg/kg | 0.1   | <0.1 | <0.1  | <0.1 | <0.1 | <0.1  | <0.1 | <0.1 | <0.1 | <0.1 | <0.1 | <0.1 | <0.1 | <0.1  | <0.1 | <0.1 | <0.1 | <0.1 | <0.1 |
| - Stirofos (Tet-<br>rachlorvinphos) | EPA 3550C<br>2007 + EPA<br>8270D 2007 | mg/kg | 0.1   | <0.1 | <0.1  | <0.1 | <0.1 | <0.1  | <0.1 | <0.1 | <0.1 | <0.1 | <0.1 | <0.1 | <0.1 | <0.1  | <0.1 | <0.1 | <0.1 | <0.1 | <0.1 |
| - Tokuthion<br>(Prothiofos)         | EPA 3550C<br>2007 + EPA<br>8270D 2007 | mg/kg | 0.1   | <0.1 | <0.1  | <0.1 | <0.1 | <0.1  | <0.1 | <0.1 | <0.1 | <0.1 | <0.1 | <0.1 | <0.1 | <0.1  | <0.1 | <0.1 | <0.1 | <0.1 | <0.1 |
| - Bolstar<br>(Sulprofos)            | EPA 3550C<br>2007 + EPA<br>8270D 2007 | mg/kg | 0.1   | <0.1 | <0.1  | <0.1 | <0.1 | <0.1  | <0.1 | <0.1 | <0.1 | <0.1 | <0.1 | <0.1 | <0.1 | <0.1  | <0.1 | <0.1 | <0.1 | <0.1 | <0.1 |
| - Azinphos-me-<br>thyl (Guthion)    | EPA 3550C<br>2007 + EPA<br>8270D 2007 | mg/kg | 0.1   | <0.1 | <0.1  | <0.1 | <0.1 | <0.1  | <0.1 | <0.1 | <0.1 | <0.1 | <0.1 | <0.1 | <0.1 | <0.1  | <0.1 | <0.1 | <0.1 | <0.1 | <0.1 |
| - Coumaphos                         | EPA 3550C<br>2007 + EPA<br>8270D 2007 | mg/kg | 0.1   | <0.1 | <0.1  | <0.1 | <0.1 | <0.1  | <0.1 | <0.1 | <0.1 | <0.1 | <0.1 | <0.1 | <0.1 | <0.1  | <0.1 | <0.1 | <0.1 | <0.1 | <0.1 |
| Formaldehyde                        | EPA 8315A<br>1996                     | mg/kg | <0.50 | 3.50 | <0,50 | 5.2  | 109  | <0,50 | 45   | 480  | 218  | 47   | 13   | 236  | 15.2 | <0,50 | 2.48 | 15.2 | 45   | 12.3 | 1.50 |
| Acetone                             | EPA 8315A<br>1996                     | mg/kg | 5     | 6    | 200   | <5   | <5   | <5    | <5   | <5   | <5   | <5   | 65   | 8    | 14   | 23    | <5   | 13   | <5   | 42   | <5   |

**Table S2.** Descriptive analytics of the measurements reported in Table S1. LOD: Limit of Detection.

| <b>Determination</b> | <b>Min</b> | <b>Max</b> | <b>Average</b> | <b>Standard Deviation</b> | <b>RDS</b> |
|----------------------|------------|------------|----------------|---------------------------|------------|
| pH                   | 3.7        | 7.8        | 4.77           | 15.2                      | 318.8      |
| Dry matter at 105 °C | 53.7       | 95.7       | 88.1           | 1550.0                    | 1758.7     |
| Humidity             | 4.3        | 46.3       | 11.9           | 1550.0                    | 13062.1    |
| Dry matter at 600 °C | 0.32       | 4.0        | 1.22           | 17.4                      | 1427.8     |
| Total Cyanides       | < LOD      | < LOD      | -              | -                         | -          |
| Sulfur               | < LOD      | < LOD      | -              | -                         | -          |
| Aluminum             | 2.5        | 2540       | 170.6          | 5951547                   | 3489506    |
| Antimony             | 0.78       | 0.78       | 0.78           | 0                         | 0          |
| Silver               | < LOD      | < LOD      | -              | -                         | -          |
| Arsenic              | 2.3        | 2.3        | 2.30           | 0                         | 0          |
| Barium               | 0.86       | 55.6       | 15.3           | 3991.1                    | 26098.9    |
| Beryllium            | < LOD      | < LOD      | -              | -                         | -          |
| Boron                | 1.6        | 64.7       | 8.33           | 3466.1                    | 41620.9    |
| Cadmium              | 0.34       | 0.34       | 0.34           | 0                         | 0          |
| Calcium              | 585        | 54960      | 4473.1         | 2.71E+09                  | 60593533   |
| Cobalt               | 2.7        | 2.7        | 2.70           | 0                         | 0          |
| Total Chromium       | 0.57       | 26.6       | 4.88           | 552.9                     | 11327.1    |
| Chromium VI          | < LOD      | < LOD      | -              | -                         | -          |
| Iron                 | 6.9        | 4655       | 385.6          | 20412041                  | 5293045    |
| Magnesium            | 95.2       | 4275       | 449.1          | 15682560                  | 3492040    |
| Manganese            | 3.2        | 260        | 50.4           | 63591.7                   | 126160     |
| Mercury              | < LOD      | < LOD      | -              | -                         | -          |
| Molybdenum           | 0.94       | 0.94       | 0.94           | 0                         | 0          |
| Nickel               | 0.54       | 13.2       | 3.83           | 117.1                     | 3056.2     |
| Lead                 | 0.67       | 11.5       | 3.74           | 115.8                     | 3092.5     |
| Potassium            | 152        | 4780       | 1188.2         | 19390559                  | 1631973    |
| Copper               | 0.53       | 24.9       | 3.30           | 525.0                     | 15893.2    |
| Selenium             | < LOD      | < LOD      | -              | -                         | -          |
| Silicon              | 4.8        | 70         | 39.4           | 7626.4                    | 19348.2    |
| Sodium               | 8.8        | 1145       | 188.0          | 1561109                   | 830274.1   |



|                                |       |       |       |         |          |
|--------------------------------|-------|-------|-------|---------|----------|
| Tin                            | 0.69  | 0.69  | 0.69  | 0       | 0        |
| Thallium                       | < LOD | < LOD | -     | -       | -        |
| Tellurium                      | < LOD | < LOD | -     | -       | -        |
| Titanium                       | 0.67  | 50.3  | 7.38  | 2091.6  | 28329.4  |
| Vanadium                       | 0.6   | 8.9   | 1.24  | 63.0    | 5074.3   |
| Zinc                           | 1.3   | 58.2  | 9.10  | 2906.2  | 31935.8  |
| Total Organic Compound (TOC)   | 17.8  | 47.7  | 43.6  | 790.2   | 1812.3   |
| Aliphatic hydrocarbons (C5÷C8) | < LOD | < LOD | -     | -       | -        |
| Aromatic hydrocarbons (C9÷C10) | < LOD | < LOD | -     | -       | -        |
| Hydrocarbons (C10÷C40)         | 325   | 1770  | 818.4 | 2780186 | 339694.3 |
| Benzene                        | < LOD | < LOD | -     | -       | -        |
| Toluene                        | 0.23  | 1.2   | 0.68  | 0.48    | 70.8     |
| Ethylbenzene                   | < LOD | < LOD | -     | -       | -        |
| o-Xylene                       | < LOD | < LOD | -     | -       | -        |
| m-Xylene                       | < LOD | < LOD | -     | -       | -        |
| p-Xylene                       | < LOD | < LOD | -     | -       | -        |
| Styrene                        | 0.57  | 0.57  | 0.57  | 0       | 0        |
| Isopropylbenzene               | < LOD | < LOD | -     | -       | -        |
| 1,2,4-Trimethylbenzene         | < LOD | < LOD | -     | -       | -        |
| 1,3,5-Trimethylbenzene         | < LOD | < LOD | -     | -       | -        |
| Chloromethane                  | < LOD | < LOD | -     | -       | -        |
| Vinyl Chloride                 | < LOD | < LOD | -     | -       | -        |
| 1,1-Dichloroethylene           | < LOD | < LOD | -     | -       | -        |
| Dichloromethane                | < LOD | < LOD | -     | -       | -        |
| trans-1,2-Dichloroethylene     | < LOD | < LOD | -     | -       | -        |
| 1,1-Dichloroethane             | < LOD | < LOD | -     | -       | -        |
| Trichloromethane (Chloroform)  | < LOD | < LOD | -     | -       | -        |
| cis-1,2-Dichloroethylene       | < LOD | < LOD | -     | -       | -        |
| 1,1,1-Trichloroethane          | < LOD | < LOD | -     | -       | -        |
| Carbon tetrachloride           | < LOD | < LOD | -     | -       | -        |
| 1,1-Dichloropropene            | < LOD | < LOD | -     | -       | -        |
| Trichloroethylene              | < LOD | < LOD | -     | -       | -        |
| 1,2-Dichloroethane             | < LOD | < LOD | -     | -       | -        |
| 1,2-Dichloropropane            | < LOD | < LOD | -     | -       | -        |

|                             |       |       |      |        |       |
|-----------------------------|-------|-------|------|--------|-------|
| cis-1.3-Dichloropropene     | < LOD | < LOD | -    | -      | -     |
| Tetrachloroethylene (PCE)   | < LOD | < LOD | -    | -      | -     |
| 1.1.2-Trichloroethane       | < LOD | < LOD | -    | -      | -     |
| trans-1.3-Dichloropropene   | < LOD | < LOD | -    | -      | -     |
| 1.1.1.2-Tetrachloroethane   | < LOD | < LOD | -    | -      | -     |
| 1.3-Dichloropropane         | < LOD | < LOD | -    | -      | -     |
| 1.1.2.2-Tetrachloroethane   | < LOD | < LOD | -    | -      | -     |
| 1.2.3-Trichloropropane      | < LOD | < LOD | -    | -      | -     |
| Hexachlorobutadiene         | < LOD | < LOD | -    | -      | -     |
| 1.2-Dibromo-3-chloropropane | < LOD | < LOD | -    | -      | -     |
| Bromochloromethane          | < LOD | < LOD | -    | -      | -     |
| Bromodichloromethane        | < LOD | < LOD | -    | -      | -     |
| Dibromochloromethane        | < LOD | < LOD | -    | -      | -     |
| 1.2-Dibromoethane           | < LOD | < LOD | -    | -      | -     |
| Tribromomethane (Bromoform) | < LOD | < LOD | -    | -      | -     |
| Naphthalene                 | < LOD | < LOD | -    | -      | -     |
| Acenaphthylene              | < LOD | < LOD | -    | -      | -     |
| Acenaftene                  | < LOD | < LOD | -    | -      | -     |
| Fluorenes                   | < LOD | < LOD | -    | -      | -     |
| Fenanthrene                 | 0.23  | 0.34  | 0.27 | 0.008  | 3.02  |
| Anthracene                  | < LOD | < LOD | -    | -      | -     |
| Fluorantene                 | 0.16  | 0.25  | 0.20 | 0.004  | 2.00  |
| Perylene                    | 0.16  | 0.16  | 0.16 | 0      | 0     |
| Pyrene                      | 0.12  | 0.14  | 0.13 | 0.0002 | 0.154 |
| Benzo(a)anthracene          | < LOD | < LOD | -    | -      | -     |
| Crysene                     | < LOD | < LOD | -    | -      | -     |
| Benzo(b)fluorantenes        | < LOD | < LOD | -    | -      | -     |
| Benzo(k+j)fluorantenes      | < LOD | < LOD | -    | -      | -     |
| Benzo(e)pyrene              | < LOD | < LOD | -    | -      | -     |
| Benzo(a)pyrene              | < LOD | < LOD | -    | -      | -     |
| Indeno(1.2.3-cd)pyrenees    | < LOD | < LOD | -    | -      | -     |
| Dibenzo(ah)anthracene       | < LOD | < LOD | -    | -      | -     |
| Benzo(ghi)perilene          | < LOD | < LOD | -    | -      | -     |
| Dibenzo(al)pyrene           | < LOD | < LOD | -    | -      | -     |

|                           |       |       |   |   |   |
|---------------------------|-------|-------|---|---|---|
| Dibenzo(ae)pyrene         | < LOD | < LOD | - | - | - |
| Dibenzo(ai)pyrene         | < LOD | < LOD | - | - | - |
| Dibenzo(ah)pyrene         | < LOD | < LOD | - | - | - |
| Etridiazole               | < LOD | < LOD | - | - | - |
| Chloroneb                 | < LOD | < LOD | - | - | - |
| alfa-BHC                  | < LOD | < LOD | - | - | - |
| Simazine                  | < LOD | < LOD | - | - | - |
| Atrazine                  | < LOD | < LOD | - | - | - |
| beta-BHC                  | < LOD | < LOD | - | - | - |
| gamma-BHC (Lindane)       | < LOD | < LOD | - | - | - |
| delta-BHC                 | < LOD | < LOD | - | - | - |
| Chlorothalonil            | < LOD | < LOD | - | - | - |
| Alachlor                  | < LOD | < LOD | - | - | - |
| Heptachlor                | < LOD | < LOD | - | - | - |
| Aldrin                    | < LOD | < LOD | - | - | - |
| Chlorthal-dimethyl (DCPA) | < LOD | < LOD | - | - | - |
| Isodrin                   | < LOD | < LOD | - | - | - |
| Heptachlor epoxide b      | < LOD | < LOD | - | - | - |
| trans-Chlordane           | < LOD | < LOD | - | - | - |
| o.p'-DDE                  | < LOD | < LOD | - | - | - |
| Endosulfan I              | < LOD | < LOD | - | - | - |
| cis-Chlordane             | < LOD | < LOD | - | - | - |
| trans-Nonachlor           | < LOD | < LOD | - | - | - |
| p.p'-DDE                  | < LOD | < LOD | - | - | - |
| Dieldrin                  | < LOD | < LOD | - | - | - |
| o.p'-DDD                  | < LOD | < LOD | - | - | - |
| Endrin                    | < LOD | < LOD | - | - | - |
| Endosulfan II             | < LOD | < LOD | - | - | - |
| p.p'-DDD                  | < LOD | < LOD | - | - | - |
| o.p'-DDT                  | < LOD | < LOD | - | - | - |
| Endrin aldehyde           | < LOD | < LOD | - | - | - |
| Kepone                    | < LOD | < LOD | - | - | - |
| Endosulfan sulfate        | < LOD | < LOD | - | - | - |
| p.p'-DDT                  | < LOD | < LOD | - | - | - |

|                              |       |       |       |             |             |
|------------------------------|-------|-------|-------|-------------|-------------|
| Methoxychlor                 | < LOD | < LOD | -     | -           | -           |
| Mirex                        | < LOD | < LOD | -     | -           | -           |
| Permethrins-I                | < LOD | < LOD | -     | -           | -           |
| Permethrins-II               | < LOD | < LOD | -     | -           | -           |
| Diclorvos (DDVP)             | < LOD | < LOD | -     | -           | -           |
| Mevinphos (Phosdrin)         | < LOD | < LOD | -     | -           | -           |
| Demeton-S                    | < LOD | < LOD | -     | -           | -           |
| Ethoprophos                  | < LOD | < LOD | -     | -           | -           |
| Naled (Dibrom)               | < LOD | < LOD | -     | -           | -           |
| Phorate                      | < LOD | < LOD | -     | -           | -           |
| Demeton-O                    | < LOD | < LOD | -     | -           | -           |
| Diazinon                     | < LOD | < LOD | -     | -           | -           |
| Disulfoton                   | < LOD | < LOD | -     | -           | -           |
| methyl-Parathion             | < LOD | < LOD | -     | -           | -           |
| Fenchlorphos (Ronnel)        | < LOD | < LOD | -     | -           | -           |
| Fenthion                     | < LOD | < LOD | -     | -           | -           |
| Chlorpyrifos (Dursban)       | < LOD | < LOD | -     | -           | -           |
| Trichloronate                | < LOD | < LOD | -     | -           | -           |
| Merphos                      | < LOD | < LOD | -     | -           | -           |
| Stirofos (Tetrachlorvinphos) | < LOD | < LOD | -     | -           | -           |
| Tokuthion (Prothiofos)       | < LOD | < LOD | -     | -           | -           |
| Bolstar (Sulprofos)          | < LOD | < LOD | -     | -           | -           |
| Azinphos-methyl (Guthion)    | < LOD | < LOD | -     | -           | -           |
| Coumaphos                    | < LOD | < LOD | -     | -           | -           |
| Formaldehyde                 | 2.48  | 480   | 89.06 | 241537.1151 | 271198.4803 |
| Acetone                      | 6     | 200   | 46.4  | 29777.9     | 64211.1     |
